1 **Real-time luminescence assay for cytoplasmic cargo delivery of extracellular**

2 **vesicles**

3

4 Masaharu Somiya\* and Shun'ichi Kuroda

5 *The Institute of Scientific and Industrial Research, Osaka University, Osaka 567-0047,*

6 *Japan*

7

8 \*Corresponding author: Prof. Masaharu Somiya, Ph.D.

9 Department of Biomolecular Science and Reaction, The Institute of Scientific and

10 Industrial Research, Osaka University, 8-1 Mihogaoka, Ibaraki, Osaka 567-0047, Japan.

11 E-mail: [msomiya@sanken.osaka-u.ac.jp](mailto:msomiya@sanken.osaka-u.ac.jp)

12 Phone: 81-6-6879-8462

13

14

15 **Abstract**

16 Extracellular vesicles (EVs) have been considered to deliver biological cargos between  
17 cells and mediate intercellular communication. However, the mechanisms that underlie  
18 the biological process of EV uptake and cytoplasmic cargo release in recipient cells are  
19 largely unknown. Quantitative and real-time assays for assessment of the cargo delivery  
20 efficiency inside recipient cells have not been feasible. In this study, we developed an  
21 EV cargo delivery (EVCD) assay using a split luciferase called the NanoBiT system.  
22 Recipient cells expressing LgBiT, a large subunit of luciferase, emit luminescence when  
23 the EV cargo proteins fused with a small luminescence tag (HiBiT tag) that can  
24 complement LgBiT are delivered to the cytoplasm of recipient cells. Using the EVCD  
25 assay, the cargo delivery efficiency of EVs could be quantitatively measured in real  
26 time. This assay was highly sensitive in detecting a single event of cargo delivery per  
27 cell. We found that modification of EVs with a virus-derived fusogenic protein  
28 significantly enhanced the cytoplasmic cargo delivery; however, in the absence of a  
29 fusogenic protein, the cargo delivery efficiency of EVs was below the threshold of the  
30 assay. The EVCD assay could assess the effect of entry inhibitors on EV cargo delivery.  
31 Furthermore, using a luminescence microscope, the cytoplasmic cargo delivery of EVs

32 was directly visualized in living cells. This assay could reveal the biological mechanism

33 of the cargo delivery processes of EVs.

34

35 **Keywords:** cargo transfer; extracellular vesicles; membrane fusion; NanoBiT; VSV-G

36

## 37 **Introduction**

38 Extracellular vesicles (EVs), membranous nanoparticles secreted by living cells,  
39 are thought to be involved in intercellular communication in various species from  
40 microorganisms to vertebrate <sup>1,2</sup>. Since EVs contain cargo molecules such as RNAs and  
41 proteins in their luminal space, they may deliver the cargo molecules into recipient cells  
42 and regulate biological functions in the recipient cells. Numerous studies have shown  
43 that the treatment of recipient cells with EVs containing specific cargos (especially  
44 microRNAs or proteins) results in phenotypic changes in the recipient cells. Owing to  
45 the delivery capability of biomolecules, EVs have been studied as a promising drug  
46 delivery system for therapeutic proteins or RNAs <sup>3,4</sup>.

47 However, the cargo delivery mechanism of EVs, especially the process of  
48 cytoplasmic cargo release, remains largely unknown <sup>5</sup>. Mechanistically, EVs are mainly  
49 endocytosed by recipient cells, fuse with the endosomal/lysosomal membrane, and  
50 release their cargo into the cytoplasm <sup>5,6</sup>. Although few studies have shown that EVs are  
51 capable of fusing with the cellular membrane of recipient cells <sup>7,8</sup>, direct evidence  
52 indicating the cytoplasmic cargo delivery of EVs has not been demonstrated.

53 We discussed the possibility of “EV cargo transfer hypothesis” in our previous  
54 review and concluded that cargo delivery by EVs might not be a frequent event as

55 generally accepted<sup>9</sup>. Several studies have suggested that EV-mediated cargo delivery is  
56 a rare event. When the recipient cells are treated with EVs *in vitro*, only 0.1% to 5.0%  
57 of the cell population exhibit the functional readout of cargo delivery, although the  
58 efficacy depends on the experimental system<sup>10-12</sup>.

59           To decipher the mechanism and physiological relevance of EV cargo delivery,  
60 a feasible and reliable assay to measure cargo delivery in real time is necessary.  
61 Conventionally, cargo delivery of EVs is evaluated by the phenotypic change in the  
62 recipient cells, although these methods are often interfered with the experimental  
63 artifacts that can be induced by contaminants in the EV fraction<sup>13</sup>. Another approach  
64 for the assessment of EV cargo delivery involves use of reporter assays for measuring  
65 functional miRNA activity in recipient cells<sup>14</sup>. This assay is based on the assumption  
66 that EV-mediated delivery of miRNA leads to a change in reporter gene expression in  
67 recipient cells. However, this assay could not demonstrate direct evidence of cargo  
68 transfer by EVs because of several confounding factors<sup>9</sup>.

69           In this study, we developed a quantitative and real-time luminescence assay to  
70 measure cargo protein delivery by EVs in recipient cells. The key feature of this EV  
71 cargo delivery (EVCD) assay is the luciferase complementation assay using *Oplophorus*  
72 *gracilirostris*-derived highly bright luciferase (NanoLuc)<sup>15,16</sup>. A small fragment of

73 NanoLuc (HiBiT tag) was fused to EV cargo proteins, while the large subunit of  
74 NanoLuc (LgBiT) was expressed in recipient cells. When the HiBiT-tagged cargo  
75 proteins are delivered to the cytoplasm of recipient cells, luciferase fragments  
76 complement and emit luminescence signals (Fig. 1A). Since the complemented  
77 NanoLuc is much brighter than conventional luciferases such as firefly or *Renilla*  
78 luciferases, NanoLuc-based assays are sensitive enough to detect the rare event of EV  
79 cargo delivery. Furthermore, this assay enabled us to measure the kinetics of cargo  
80 protein delivery by EVs and to visualize the cytoplasmic cargo delivery by EVs in real  
81 time.  
82

## 83 **Results and Discussion**

### 84 *Characterization of HiBiT-tagged EV cargo proteins*

85 The EVCD assay (Fig. 1A) is based on the complementation of HiBiT and LgBiT in the  
86 cytoplasm. When the EVs containing HiBiT-tagged cargo are delivered to the  
87 cytoplasm of LgBiT-expressing recipient cells, emitted luminescence can be detected.

88 To establish the EVCD assay, we first attempted to tag the EV cargos with HiBiT (Fig.  
89 1B). Three types of protein EV cargos including EGFP, a self-assembling protein  
90 EPN-01<sup>17</sup>, and tetraspanins were used. The first cargo EGFP was tagged at the  
91 N-terminal with HiBiT and overexpressed in the donor cells. Cytoplasmic EGFPs may  
92 be passively loaded into EVs. The second cargo EPN-01 was a nanocage-forming  
93 protein that was designed *de novo* and secreted from cells via the ESCRT pathway with  
94 EVs<sup>17</sup>. The original Myc-tag of this cargo was replaced with an HiBiT tag.  
95 Tetraspanins, typical EV marker proteins embedded in the EV membrane, were also  
96 tagged with HiBiT at their N-termini.

97 All HiBiT-tagged proteins were expressed in HEK293T cells, and expression  
98 levels were measured by mixing cell lysates with LgBiT and NanoLuc substrates (Fig.  
99 1C). EGFP and EPN-01 showed high and moderate expression levels, respectively.  
100 HiBiT-tagged tetraspanins demonstrated low expression, suggesting that these proteins

101 did not have ease of utility in subsequent experiments. Expression of HiBiT-tagged  
102 EGFP and EPN-01 was confirmed by western blotting using LgBiT as a probe protein,  
103 whereas HiBiT-tagged tetraspanins could not be detected (Fig. 1D). These results  
104 confirmed that EGFP and EPN-01 had feasibility in the EVCD assay.

105 We assessed whether HiBiT-tagged cargo proteins were encapsulated in EVs by  
106 immunoprecipitation (Fig. S1). EVs in the culture supernatant were immunoprecipitated  
107 using antibodies targeting CD81, a typical EV marker (Fig. S1A), and vesicular  
108 stomatitis virus glycoprotein (VSV-G), a fusogenic viral membrane protein that was  
109 incorporated into EVs (Fig. S1B). When the supernatant of the cargo protein-expressing  
110 cells was immunoprecipitated using anti-CD81 antibodies, cargo proteins were  
111 precipitated, indicating that cargo proteins were encapsulated inside EVs (Fig. S1C and  
112 S1D). Furthermore, anti-VSV-G antibody could enrich HiBiT-tagged proteins  
113 co-expressed with VSV-G, suggesting the incorporation of VSV-G in the EV membrane  
114 <sup>17</sup> and encapsulation of HiBiT-tagged cargo proteins (Fig. S1C and S1E).  
115 Immunoprecipitation was strongly abrogated by detergent treatment (Fig. S1F),  
116 indicating that the HiBiT-tagged cargo protein was encapsulated in VSV-G<sup>+</sup> and/or  
117 CD81<sup>+</sup> membrane vesicles.



118            Generally, the amount of EVs in the supernatant is low; therefore, a  
119            concentration process is necessary to acquire a sufficient amount of EVs for the assay.  
120            In this study, EVs containing HiBiT-tagged proteins were concentrated by  
121            poly(ethylene glycol) (PEG) precipitation, which is a feasible concentration method for  
122            small-scale purification<sup>18</sup>. As shown in Table 1, HiBiT-tagged EPN-01 was enriched  
123            more than 10-fold by PEG precipitation, whereas HiBiT-tagged EGFP was not enriched.  
124            This result indicated that a large fraction of EPN-01 in the supernatant was encapsulated  
125            within EVs, while the majority of EGFPs were not encapsulated in EVs. Concentrated  
126            EV fraction contained VSV-G and EV marker proteins (CD9, CD63, and CD81),  
127            suggested that PEG precipitation successfully concentrated the VSV-G-displaying EVs  
128            (Fig. 1E).

129

130

131

132 **Table 1** PEG precipitation of EVs encapsulating HiBiT-tagged protein cargo (N = 3,  
133 mean  $\pm$  SD)

| Transfection | HiBiT enrichment (-) <sup>1</sup> | HiBiT yield (%) |
|--------------|-----------------------------------|-----------------|
| EPN-01       | -                                 | 12.4 $\pm$ 3.4  |
|              | + VSV-G                           | 27.6 $\pm$ 7.6  |
| EGFP         | -                                 | 12.4 $\pm$ 1.4  |
|              | + VSV-G                           | 27.5 $\pm$ 3.1  |
| EGFP         | -                                 | 0.3 $\pm$ 0.1   |
|              | + VSV-G                           | 3.3 $\pm$ 2.5   |
| EGFP         | -                                 | 0.3 $\pm$ 0.1   |
|              | + VSV-G                           | 6.0 $\pm$ 5.4   |

134 <sup>1</sup> HiBiT enrichment factor was calculated using the amounts of HiBiT before and after  
135 the PEG precipitation.

136

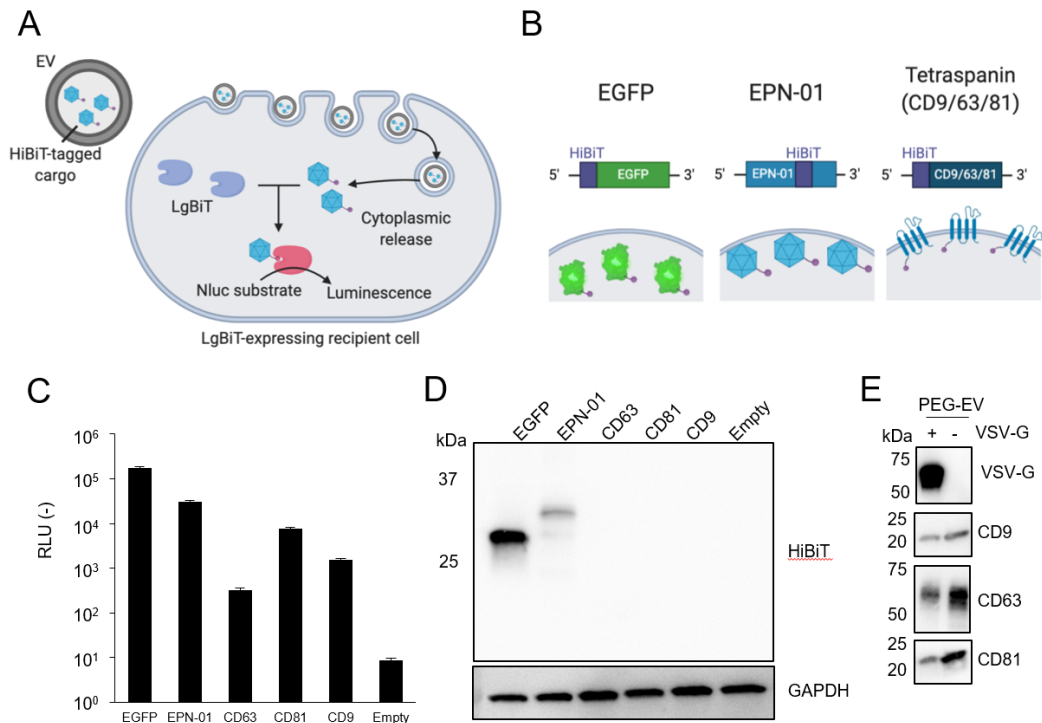

137

138 **Fig. 1** Summary of the EVCD assay and characterization of HiBiT-tagged EV cargo

139 proteins

140 (A) Schematic representation of the EVCD assay. EV containing HiBiT-tagged cargo is

141 internalized by LgBiT-expressing recipient cells, followed by cytoplasmic release of the

142 cargo. Spontaneous complementation of HiBiT-tagged protein cargo with LgBiT leads

143 to the elicitation of luminescence. (B) Schematic representation of HiBiT-tagged

144 proteins. Upper panels show the structure of expression plasmids. Lower panels show

145 the protein localization inside EVs. (C) Expression levels of HiBiT-tagged EV cargo

146 proteins in donor HEK293T cells. N=3, mean  $\pm$  SD. (D) Detection of HiBiT-tagged

147 proteins in cell lysate of transfected HEK293T cells using LgBiT as a probe. GAPDH  
148 was used as a loading control. (E) Detection of VSV-G and EV marker proteins in  
149 purified EV fraction. Culture supernatant was concentrated by PEG precipitation and  
150 subjected to western blotting

151

152 Notably, substantial amounts of non-encapsulated HiBiT-tagged proteins (both  
153 EPN-01 and EGFP) were present in the resultant EV fraction that could interfere with  
154 the EVCD assay. Therefore, in the subsequent EVCD assay, it is mandatory to use a  
155 DrkBiT peptide that complements and inactivates the luciferase activity of LgBiT to  
156 competitively block the non-encapsulated HiBiT-tagged proteins (see below).

157

#### 158 *Real-time EVCD assay*

159 We first estimated the sensitivity of the EVCD assay using a synthetic HiBiT peptide.  
160 After lysis of approximately  $1.0 \times 10^5$  LgBiT-expressing HEK293T cells, an HiBiT  
161 peptide and a NanoLuc substrate were added to the lysate and luminescence signal was  
162 measured (Fig. 2A). Approximately 0.1 fmol of the HiBiT peptide was detected,

163 suggesting that the assay was capable of measuring remarkably less amounts of  
164 cytoplasmic cargo in the recipient cells.

165           Next, we measured the cargo delivery kinetics of EVs containing either  
166 HiBiT-tagged EGFP or EPN-01. The first observation of EPN-01-containing EVs in the  
167 EVCD assay demonstrated no luminescence signal within 90 min (Fig. 2B). For  
168 controls, we used the EVs displaying VSV-G proteins, which confer EVs with  
169 fusogenic activity that facilitates the cargo delivery of EVs by membrane fusion  
170 between the EV and cellular membranes<sup>17,19</sup>. Evidently, VSV-G-displaying EVs  
171 induced a gradual increase in the luminescence signal (Fig. 2C), suggesting that the  
172 HiBiT-tagged EPN-01 was delivered to the cytoplasm and the presence of membrane  
173 fusion proteins such as VSV-G was indispensable for achieving substantial cargo  
174 delivery. The luminescence signal was observed as soon as 20 min after the addition of  
175 EVs (Fig. 2D), suggesting that VSV-G could induce prompt fusion and release of  
176 EPN-01 cargo into the cytoplasm. This result was consistent with that of previous  
177 studies showing that the internalization and fusion of VSV was a rapid process, within 3  
178 min in HeLa cells<sup>20</sup> and 20 min in BHK cells<sup>21</sup>.

179           As described above, the concentrated EV fraction contains a substantial amount  
180 of HiBiT-tagged proteins outside of EVs. Moreover, LgBiT may be leaked from the

181 recipient cells into the medium<sup>22</sup>. These components significantly affect the sensitivity  
182 and accuracy of the EVCD assay. As shown in Fig. S2, in the absence of DrkBiT, a  
183 sudden increase in the luminescence signal was observed immediately after the addition  
184 of EVs (Fig. S2A). However, in the presence of 1  $\mu$ M DrkBiT in the buffer,  
185 luminescence signal emitted by EV-mediated cargo delivery was distinguishable from  
186 non-specific luminescence signal (Fig. S2B), indicating that nonspecific  
187 complementation of LgBiT and HiBiT outside the recipient cells interfered with the  
188 assay. Therefore, it is mandatory to use a DrkBiT peptide in the EVCD assay to avoid  
189 non-specific background signals.

190           To validate the EVCD assay and exclude an experimental artifact, we used  
191 mutant VSV-G(P127D) that is incapable of fusing with the host cell membrane<sup>23</sup>.  
192 Using both EGFP and EPN-01 as cargos, VSV-G(P127D) decreased the cargo delivery  
193 efficacy of EVs compared to the parental VSV-G (Fig. 2D and 2E), which was  
194 consistent with the findings of a previous report demonstrating that the fusogenic  
195 activity of VSV-G was indispensable for cytoplasmic delivery of the EV cargo<sup>17,24</sup>.  
196 These results support that the EVCD assay can elucidate the fusion and cytoplasmic  
197 cargo release of EVs in recipient cells.

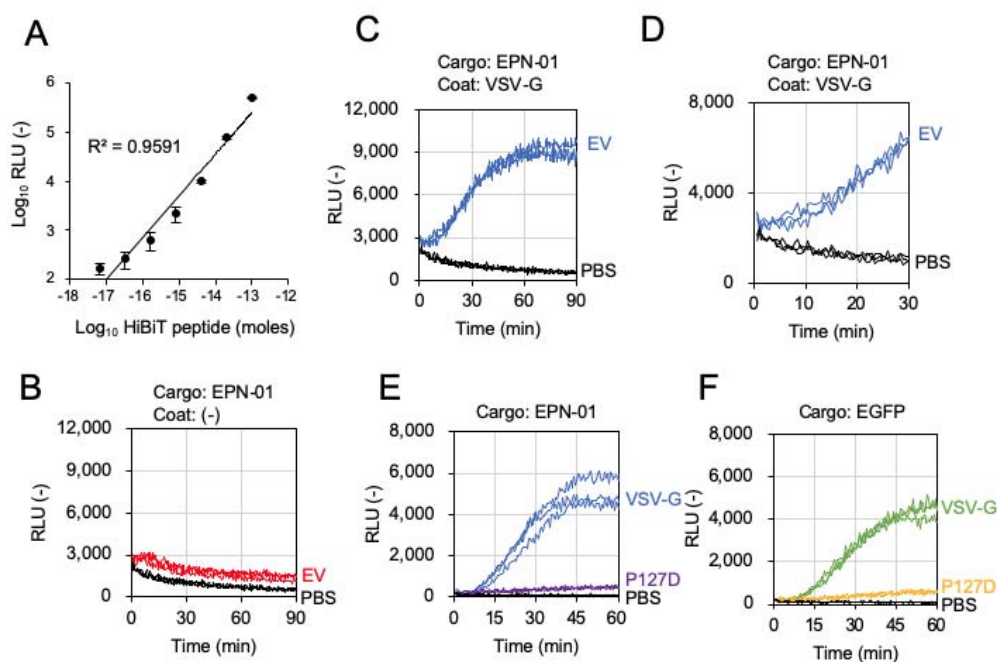

198

199 **Fig. 2** EV cargo delivery (EVCD) assay

200 (A) Quantitative curve of the HiBiT peptide in cell lysate of LgBiT-expressing

201 HEK293T. N=3, mean  $\pm$  SD. (B) EVCD assay using EPN-01-containing EVs without

202 fusogenic protein. (C) EVCD assay using EPN-01-containing EVs with fusogenic

203 protein VSV-G. (D) Enlargement of (C) from 0 to 30 min. (E) EVCD assay using

204 EPN-01-containing EVs with either VSV-G or VSV-G(P127D). (F) EVCD assay using

205 EGFP-containing EVs with either VSV-G or VSV-G(P127D). PBS was used as a

206 negative control. All kinetics data represent information obtained from experiments

207 conducted in triplicate.

208

209 *Evaluation of EV entry inhibitors using the EVCD assay*

210 We evaluated the effect of compounds that are known to inhibit endocytosis and  
211 membrane fusion by using the EVCD assay with EPN-01-containing EVs modified with  
212 VSV-G. Chlorpromazine<sup>25</sup>, Dynasore<sup>26</sup>, EIPA<sup>27</sup>, and Pitstop 2<sup>28</sup> have been known to  
213 inhibit the endocytosis of EVs, and all these compounds could significantly decrease the  
214 cargo delivery of EVs (Fig. 3A-3D). Furthermore, chloroquine<sup>29</sup> and bafilomycin A1<sup>30</sup>,  
215 both known to inhibit low pH-dependent fusion activity of VSV-G, abolished the cargo  
216 delivery of EVs in a dose-dependent manner (Fig. 3E and 3F). These results confirmed  
217 that the EVCD assay could evaluate the cargo delivery efficiency of EVs and the effect  
218 of inhibitors.



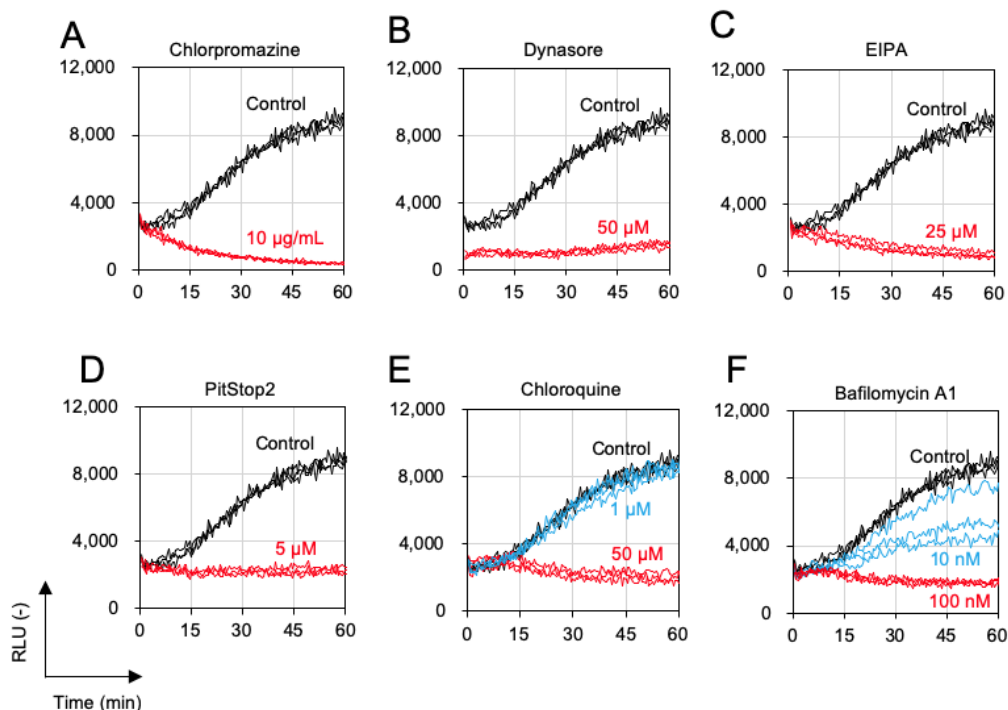

219

220 **Fig. 3** The inhibitory effect of compounds on cargo delivery by EVs

221 Endocytosis inhibitors (chlorpromazine [A], Dynasore [B], EIPA [C], and Pitstop 2 [D])

222 and membrane fusion inhibitors (chloroquine [E] and bafilomycin A1[F]) were analyzed

223 in the EVCD assay using EPN-01-containing EVs modified with VSV-G. All kinetics

224 data represent information obtained from experiments conducted in triplicate.

225

226 *The use of the EVCD assay to decipher the endosomal escape efficiency of EVs*

227 It has been reported that endosome-destabilizing reagents such as chloroquine and

228 UNC10217832A can enhance the cargo delivery of EVs<sup>31</sup>. To confirm the effect of the

229 endosomolytic reagent on the cargo delivery efficiency of EVs without VSV-G  
230 modification, we evaluated whether chloroquine could enhance the cargo delivery of  
231 EVs using the EVCD assay. Unexpectedly, chloroquine did not enhance the cargo  
232 EPN-01 delivery by EVs (Fig. 4A) for 90 min. Conversely, cargo delivery of  
233 VSV-G-modified EVs was significantly reduced by chloroquine (Fig. 3E and 4B),  
234 suggesting that chloroquine increased the pH within endosomes/lysosomes in recipient  
235 cells and inhibited membrane fusion by VSV-G.  
236

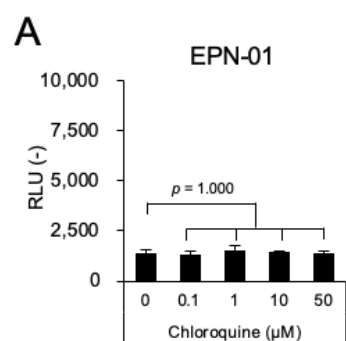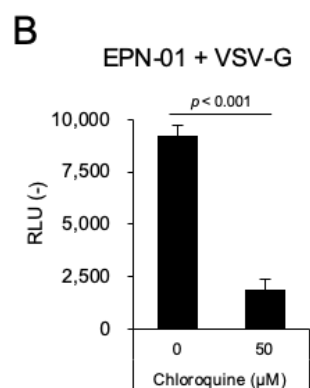

**Fig. 4** Cargo delivery efficiency of

EPN-01-containing EVs in the presence of  
chloroquine

(A) EVs without VSV-G and (B) EVs with VSV-G.

Luminescence signal after 90 min of EV treatment  
was represented. N=3, mean  $\pm$  SD. Statistical analysis  
was performed using one-way ANOVA followed by  
post hoc Dunnett's test (A) and the Student's *t*-test

246 (B).

247

248

249 *Real-time imaging of cytoplasmic cargo delivery by EVs*

250 Imaging of the real-time cytoplasmic delivery of cargo molecules in recipient cells is of

251 prime importance, as the localization and timing of cargo delivery of EVs is largely

252 unknown. The EVCD assay described above can analyze a considerable segment of the

253 event of cargo delivery in a cell population with high sensitivity. Therefore, we

254 attempted to observe the luminescence signal emitted by cargo delivery at the

255 single-cell level using a luminescence microscope. We succeeded in capturing the

256 cytoplasmic cargo release of VSV-G-containing EVs in LgBiT-expressing HEK293T

257 cells (Fig. 5A to 5C and Supplementary Video). As shown in Fig. 5B and 5C,

258 luminescence dots were observed within recipient cells over time, suggesting that

259 EPN-01 nanocages were anchored to the cytoplasmic leaflet of the endo/lysosomal

260 membrane as an intact nanocage (Fig. 5D) because of the N-terminal myristoyl group of

261 EPN-01 that could anchor the membrane organelle<sup>17</sup>.

262



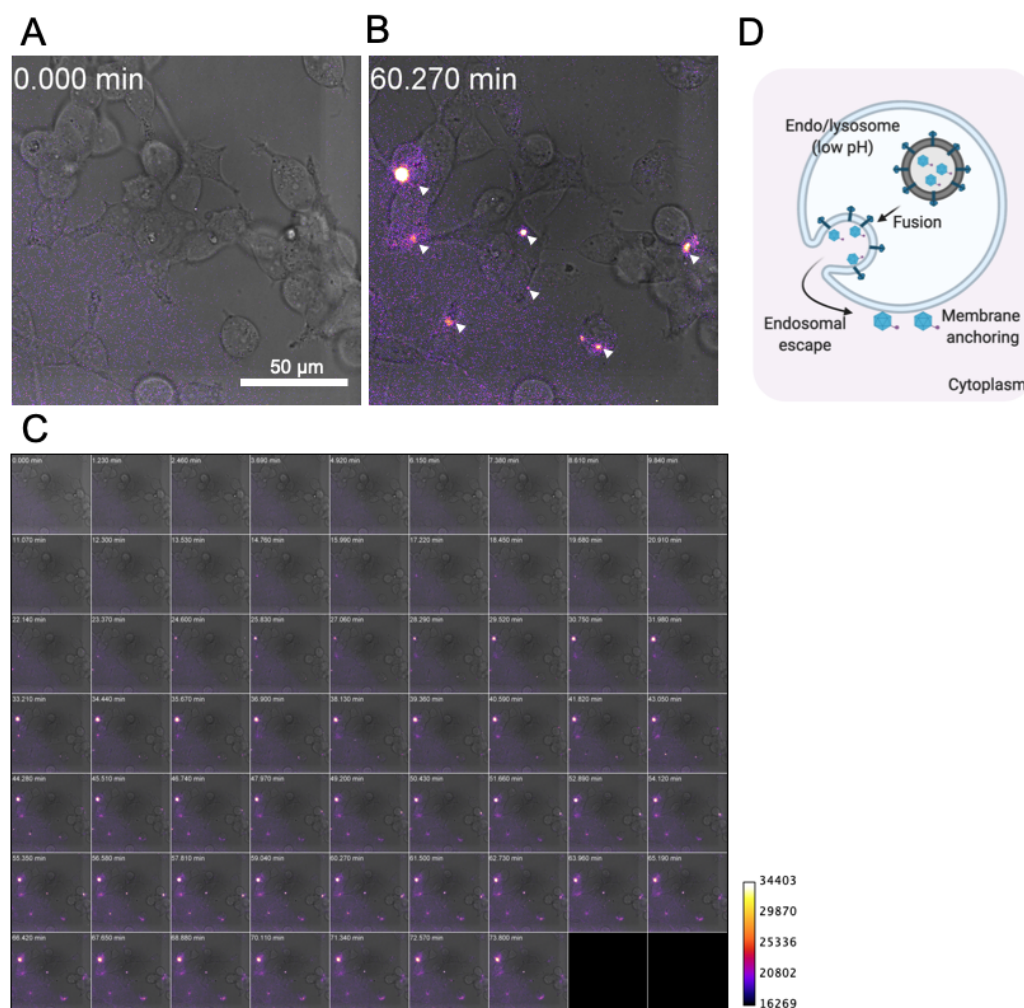

264

265 **Fig. 5** Live cell imaging of cargo delivery of EVs with VSV-G

266 Luminescence images of recipient HEK293T cells before (A) and after 60 min (B) of

267 treatment with EPN-01-containing EVs modified with VSV-G. Arrowheads indicate

268 complemented NanoLuc-derived luminescence signals within cells. (C) Series of

269 luminescence images of cells treated with EPN-01-containing EVs modified with

270 VSV-G from 0 to 73.8 min (see Supplementary Video). EVs were added at 0 min. (D)

271 Expected intracellular localization of EPN-01 after the fusion of EVs and cytoplasmic

272 release.

273

274 **Conclusions**

275 In this study, we developed a novel assay to measure the real-time cargo delivery  
276 efficiency of EVs in living recipient cells. Previously, the NanoBiT technology has been  
277 used to evaluate viral entry<sup>22,32,33</sup> and cytoplasmic drug delivery by polymeric  
278 nanomaterials<sup>34</sup>. Toribio et al. demonstrated that split EGFP-luciferase fusion proteins  
279 could be used to measure the cellular uptake of EVs<sup>35</sup>. However, their assay could not  
280 distinguish the cellular uptake of EVs from functional cargo delivery. To our knowledge,  
281 this is the first study demonstrating a feasible real-time assay for cytoplasmic cargo  
282 delivery by EVs.

283 Compared to the previously reported assays, the EVCD assay is currently the  
284 only method to directly measure the cargo delivery by EVs in living cells. Moreover,  
285 the EVCD assay reflected the membrane fusion activity of VSV-G (Fig. 2) and the  
286 effect of entry inhibitors (Fig. 3). These results proved the accuracy and feasibility of  
287 the assay for quantitative assessment of EV cargo delivery. However, other EV cargo  
288 delivery assays may have advantages over the EVCD assay in terms of sensitivity and  
289 resolution. For example, RNA (guide RNA or gRNA) delivery by EVs can be measured  
290 by a reporter assay utilizing CRISPR/Cas9, the so-called CROSS-FIRE system<sup>10</sup>. The  
291 CROSS-FIRE system can measure the delivery of functional cargo gRNA by EVs at the

292 single-cell level using flow cytometry. This assay is highly sensitive to functional cargo  
293 delivery since only a single gRNA delivered to the cytoplasm can lead to the functional  
294 readout from recipient cells. However, the CROSS-FIRE system requires multiple  
295 additions of EVs to recipient cells and several days are required to obtain the functional  
296 readout. Another example of the cargo delivery assay is the use of a BlaM protein as a  
297 cargo<sup>17,24</sup>. Cre recombinase-mediated reporter assay has also been reported in several  
298 studies<sup>11,12,31</sup>. Each assay has its own pros and cons; therefore, comprehensive analysis  
299 of EV cargo delivery may expedite the understanding of the mechanism and  
300 physiological relevance of EV-mediated cargo delivery.

301         We estimated that approximately 0.1 fmol of HiBiT per 10<sup>5</sup> cells, equivalent to  
302 approximately 600 molecules of HiBiT per cell, can be detected by the EVCD assay  
303 (Fig 2A). EPN-01 proteins spontaneously form a 60-subunit nanocage<sup>17</sup>; hence, a  
304 single nanocage has 60-HiBiT molecules. As described previously, one EV contains 14  
305 EPN-01 nanocages on average<sup>17</sup>. This indicates that a single EV potentially contains  
306 840 HiBiT molecules (14 × 60 = 840) on average. Together with the estimated  
307 sensitivity of the EVCD assay (600-HiBiT/cell), we assumed that only a single event of  
308 EV cargo delivery per cell was enough to exceed the detection threshold in the EVCD  
309 assay. In spite of the high sensitivity of the EVCD assay, we could not observe cargo



310 delivery of EVs without co-expressing VSV-G (Fig. 2B). This result suggests that the  
311 authentic EVs that do not possess known fusion proteins is not capable of delivering the  
312 cargo, at least for the combination of HEK293T-derived EVs in recipient HEK293T. It  
313 is debatable whether EV-mediated cargo delivery is more efficient in other  
314 combinations of EVs and recipient cells.

315           Fluorescence imaging is usually used to investigate intracellular trafficking of  
316 EVs. However, conventional fluorescence imaging of intracellular EVs labeled with  
317 fluorescence dyes or fluorescence proteins cannot be used to evaluate cytoplasmic cargo  
318 delivery. To overcome the current limitation of fluorescence imaging of EVs, Joshi et al.  
319 succeeded in tracing cargo release using fluorescence imaging of the recruitment of  
320 fluorescence-labeled galectin or cargo-specific nanobody<sup>7</sup>. Although their  
321 comprehensive analysis is informative to decipher the cargo release process of EVs in  
322 recipient cells, it is difficult to distinguish the *bona fide* cargo release from artifacts of  
323 galectin recruitment on endosome/lysosomes. Moreover, fluorescence imaging is not  
324 feasible for a high-throughput and real-time analysis. Luminescence imaging is more  
325 compatible with live cell imaging by avoiding phototoxicity and photobleaching, which  
326 are typical issues in live cell imaging. In this study, we succeeded in live cell imaging of  
327 an EV cargo delivery (Fig. 5). As discussed above, EPN-01 could form a 60-subunit

328 nanocage, and clustering of HiBiT in nanocage resulted in superior brightness in the  
329 imaging, as demonstrated by GFP clustering in a similar protein nanocage<sup>36</sup>.

330           Taken together, we developed a quantitative cargo delivery assay of EVs,  
331 named the EVCD assay. This assay enabled us to assess the cargo delivery of EVs in  
332 recipient cells in real-time. Since EVs are thought to be involved in many biological  
333 processes, such as intercellular communication between cells, a feasible EVCD assay  
334 may provide insight into the physiological relevance of EVs.

335

336

337 **Methods**

338 *Materials*

339 Drugs and antibodies used in this study are summarized in Supplementary Table 1.

340 NanoLuc substrates were purchased from Promega. The HiBiT peptide (amino acid

341 sequence: VSGWRLFKKIS) and the DrkBiT peptide (amino acid sequence:

342 VSGWALFKKIS)<sup>22</sup> were synthesized by GL Biochem.

343 Additionally, the plasmids used are listed in Supplementary Table 2 and will

344 soon be deposited to Addgene. Plasmids were constructed using PCR-based methods

345 (Gibson Assembly<sup>37</sup>) and were confirmed by Sanger sequencing.

346

347 *Cell culture and transfection*

348 Human embryonic kidney-derived HEK293T (RIKEN Cell Bank) cells were maintained

349 in DMEM supplemented with 10% (v/v) fetal bovine serum (FBS) and 10 µg/mL

350 penicillin-streptomycin. Cells were cultured at 37°C under 5% CO<sub>2</sub> in a humidified

351 incubator.

352 One day before the transfection, approximately  $2.0 \times 10^5$  cells/mL of

353 HEK293T cells were seeded in cell culture dishes or multi-well plates. The following

354 day, HEK293T cells were transfected with plasmid DNA using transfection reagent

355 polyethyleneimine, Transporter 5 Transfection Reagent (Polyscience, Inc.), or branched  
356 25-kDa polyethyleneimine (PEI, Sigma). The ratio of transfection reagent to plasmid  
357 DNA was 4:1 (weight). After incubation for 20 to 72 h, cells were subjected to the  
358 following experiments.

359

### 360 *Characterization of HiBiT-fused proteins*

361 The expression of HiBiT-fused proteins was analyzed using the HiBiT quantification  
362 assay and western blotting. For the quantification of HiBiT-tagged proteins, HEK293T  
363 cells transfected with the HiBiT protein expression plasmid were lysed, and the amount  
364 of the HiBiT protein was measured using the Nano Glo HiBiT Lytic Detection System  
365 (Promega). As a quantification standard for HiBiT proteins, HiBiT peptides was used.  
366 For western blotting, HEK293T cells expressing HiBiT-fused proteins were lysed with  
367 RIPA buffer containing protease inhibitor cocktail (Nacalai Tesque) and separated by  
368 SDS-PAGE. After the blotting of proteins on nitrocellulose membranes, HiBiT-fused  
369 proteins were visualized using the Nano-Glo HiBiT Blotting System (Promega). As an  
370 internal control of HiBiT proteins, GAPDH in the cell lysate was detected using a  
371 conventional western blotting protocol using the same membrane as that used for HiBiT  
372 detection.

373

374 *PEG precipitation of EVs containing the HiBiT-tagged protein cargo*

375 After 48 to 96 h of transfection, the supernatant from HEK293T expressing cargo

376 HiBiT proteins was collected, centrifuged at  $1,500 \times g$  for 5 min, mixed with one-third

377 volume of  $4 \times$  polyethylene glycol solution (40 w/v%-PEG6000, 1.2 M-NaCl,  $1 \times$ PBS

378 [pH 7.4]), and incubated at  $4^{\circ}\text{C}$  overnight. The following day, the supernatant was

379 centrifuged at  $1,600 \times g$  for 60 min, and the residual pellet was resuspended in PBS.

380 Typically, approximately 5 to 10 mL of the supernatant was concentrated to 100 to 200

381  $\mu\text{L}$  of PBS (approximately 50-fold concentration). The amount of HiBiT proteins in the

382 concentrated EV fraction was measured using the Nano Glo HiBiT Lytic Detection

383 System (Promega). EV marker proteins in the concentrated EV fraction were detected

384 by western blotting as described above.

385

386 *Live cell extracellular vesicle cargo delivery (EVCD) assay*

387 Before 24 to 48 h of performing the assay, HEK293T cells ( $1.0$  to  $2.0 \times 10^4$  cells/well)

388 seeded in a PEI-coated 96-well white plate were transfected with the LgBiT-expressing

389 plasmid. For the EVCD assay, the culture medium of LgBiT-expressing HEK293T cells

390 was replaced with HBSS (+) buffer containing  $1 \mu\text{M}$  DrkBiT, a peptide that

391 complements LgBiT and inactivates LgBiT to reduce the background luminescence  
392 signal<sup>22</sup>. After the addition of the NanoLuc substrate Nano-Glo Live Cell Assay System  
393 (Promega) to the cells, a PEG-concentrated EV fraction (approximately 20 to 100  
394 fmol-total HiBiT/well) was added to the cells and monitored for up to 90 min. For the  
395 evaluation of inhibitors in the EVCD assay, recipient cells were pretreated with the  
396 compounds 1 h before the assay and treatment with the drugs was continued throughout  
397 the assay. Microplate of recipient cells was incubated at 37°C and luminescence signal  
398 from cells was continually measured by using the Synergy 2 (BioTek) plate reader.

399

#### 400 *Live cell luminescence imaging of HiBiT cargo delivery by EVs*

401 For luminescence imaging, HEK293T cells (approximately  $1.0 \times 10^4$  cells/well) were  
402 seeded in a poly-L-lysine (PLL)-coated 35-mm multi-well dish (Matsunami Glass Ind.,  
403 Ltd.). The following day, cells were transfected with the LgBiT-expressing plasmid and  
404 cultured for 24 to 48 h. For live cell imaging, transfected HEK293T cells were washed  
405 with HBSS(+) twice and stored in HBSS (+) buffer containing 1  $\mu$ M DrkBiT and the  
406 NanoLuc substrate, followed by the addition of PEG-concentrated EVs (approximately  
407 35 fmol-total HiBiT/well). Continuous live cell imaging was carried out using the  
408 software MetaMorph and luminescence microscope LV200 (Olympus) equipped with a

409 100× objective (Olympus, UPlanSApo, NA = 1.4), a 0.5× relay lens, and an EM-CCD

410 camera, at 37°C. The exposure time for each capture was set at 60 s.

411

412 *Statistical analysis*

413 The data in this work were analyzed using one-way ANOVA and post hoc Dunnett's

414 test or the Student's *t*-test. All statistical analyses were performed using the Real

415 Statistics Resource Pack software developed by Charles Zaiontz.

416

417 **Supplementary Files**

418 ● Supplementary Data: Supplementary Methods, Fig. S1, and S2

419     Supplementary Methods

420     Fig. S1: Immunoprecipitation of EVs containing HiBiT-tagged proteins

421     Fig. S2: Requirement of DrkBiT peptide in EVCD assay

422 ● Supplementary Tables: Table S1 and S2

423     Table S1: Materials used in this study

424     Table S2: Plasmids used in this study

425 ● Supplementary Video

426 Time-lapse luminescence imaging of recipient HEK293T cells treated with EVs

427 incorporating VSV-G and HiBiT-tagged EPN-01

428

#### 429 **Acknowledgements**

430 We extend our gratitude to Yumi Yukawa for technical assistance in plasmid

431 construction. Experiments using LV200 were supported by Profs. Takeharu Nagai and

432 Mitsuru Hattori at ISIR, Osaka University. All illustrations in this work were created

433 using BioRender.com.

434 This work was supported in part by JSPS KAKENHI (Grant-in-Aid for

435 Early-Career Scientists 18K18386 and 20K15790 to MS), Research Grant from

436 JGC-Scholarship (to MS), and the “Dynamic Alliance for Open Innovation Bridging

437 Human, Environment and Materials” (MEXT).

438

439



440 **References**

- 441 (1) Kalluri, R.; LeBleu, V. S. The Biology, Function, and Biomedical Applications  
442 of Exosomes. *Science* **2020**, *367* (6478), eaau6977.  
443 <https://doi.org/10.1126/science.aau6977>.
- 444 (2) Valadi, H.; Ekström, K.; Bossios, A.; Sjöstrand, M.; Lee, J. J.; Lötvall, J. O.  
445 Exosome-Mediated Transfer of MRNAs and MicroRNAs Is a Novel Mechanism of  
446 Genetic Exchange between Cells. *Nat. Cell Biol.* **2007**, *9* (6), 654–659.  
447 <https://doi.org/10.1038/ncb1596>.
- 448 (3) Alvarez-Erviti, L.; Seow, Y.; Yin, H.; Betts, C.; Lakhali, S.; A Wood, M. J.;  
449 Wood, M. J. a; A Wood, M. J.; Wood, M. J. a; A Wood, M. J. Delivery of SiRNA to the  
450 Mouse Brain by Systemic Injection of Targeted Exosomes. *Nat. Biotechnol.* **2011**, *29*  
451 (4), 341–345. <https://doi.org/10.1038/nbt.1807>.
- 452 (4) Bliss, C. M.; Parsons, A. J.; Nachbagauer, R.; Hamilton, J. R.; Cappuccini, F.;  
453 Ulaszewska, M.; Webber, J. P.; Clayton, A.; Hill, A. V. S.; Coughlan, L. Targeting  
454 Antigen to the Surface of EVs Improves the In Vivo Immunogenicity of Human and  
455 Non-Human Adenoviral Vaccines in Mice. *Mol. Ther. - Methods Clin. Dev.* **2020**, *16*,  
456 108–125. <https://doi.org/10.1016/j.omtm.2019.12.003>.

- 457 (5) Russell, A. E.; Sneider, A.; Witwer, K. W.; Bergese, P.; Bhattacharyya, S. N.;
- 458 Cocks, A.; Cocucci, E.; Erdbrügger, U.; Falcon-Perez, J. M.; Freeman, D. W.;
- 459 Gallagher, T. M.; Hu, S.; Huang, Y.; Jay, S. M.; Kano, S.; Lavieu, G.; Leszczynska, A.;
- 460 Llorente, A. M.; Lu, Q.; Mahairaki, V.; Muth, D. C.; Noren Hooten, N.; Ostrowski, M.;
- 461 Prada, I.; Sahoo, S.; Schøyen, T. H.; Sheng, L.; Tesch, D.; Van Niel, G.;
- 462 Vandenbroucke, R. E.; Verweij, F. J.; Villar, A. V.; Wauben, M.; Wehman, A. M.; Yin,
- 463 H.; Carter, D. R. F.; Vader, P. Biological Membranes in EV Biogenesis, Stability,
- 464 Uptake, and Cargo Transfer: An ISEV Position Paper Arising from the ISEV
- 465 Membranes and EVs Workshop. *J. Extracell. Vesicles* **2019**, *8* (1), 1684862.
- 466 <https://doi.org/10.1080/20013078.2019.1684862>.
- 467 (6) Mulcahy, L. A.; Pink, R. C.; Carter, D. R. F. Routes and Mechanisms of
- 468 Extracellular Vesicle Uptake. *J. Extracell. Vesicles* **2014**, *3* (1), 1–14.
- 469 <https://doi.org/10.3402/jev.v3.24641>.
- 470 (7) Joshi, B. S.; de Beer, M. A.; Giepmans, B. N. G.; Zuhorn, I. S. Endocytosis of
- 471 Extracellular Vesicles and Release of Their Cargo from Endosomes. *ACS Nano* **2020**,
- 472 *acsnano.9b10033*. <https://doi.org/10.1021/acsnano.9b10033>.
- 473 (8) Montecalvo, A.; Larregina, A. T.; Shufesky, W. J.; Stolz, D. B.; Sullivan, M. L.
- 474 G.; Karlsson, J. M.; Baty, C. J.; Gibson, G. A.; Erdos, G.; Wang, Z.; Milosevic, J.;

475 Tkacheva, O. A.; Divito, S. J.; Jordan, R.; Lyons-Weiler, J.; Watkins, S. C.; Morelli, A.  
476 E. Mechanism of Transfer of Functional MicroRNAs between Mouse Dendritic Cells  
477 via Exosomes. *Blood* **2012**, *119* (3), 756–766.  
478 <https://doi.org/10.1182/blood-2011-02-338004>.

479 (9) Somiya, M. Where Does the Cargo Go?: Solutions to Provide Experimental  
480 Support for the “Extracellular Vesicle Cargo Transfer Hypothesis.” *J. Cell Commun.*  
481 *Signal*. **2020**. <https://doi.org/10.1007/s12079-020-00552-9>.

482 (10) de Jong, O. G.; Murphy, D. E.; Mäger, I.; Willms, E.; Garcia-Guerra, A.;  
483 Gitz-Francois, J. J.; Lefferts, J.; Gupta, D.; Steenbeek, S. C.; van Rheenen, J.; El  
484 Andaloussi, S.; Schiffelers, R. M.; Wood, M. J. A.; Vader, P. A CRISPR-Cas9-Based  
485 Reporter System for Single-Cell Detection of Extracellular Vesicle-Mediated  
486 Functional Transfer of RNA. *Nat. Commun.* **2020**, *11* (1).  
487 <https://doi.org/10.1038/s41467-020-14977-8>.

488 (11) Zomer, A.; Maynard, C.; Verweij, F. J.; Kamermans, A.; Schäfer, R.; Beerling,  
489 E.; Schiffelers, R. M.; De Wit, E.; Berenguer, J.; Ellenbroek, S. I. J.; Wurdinger, T.;  
490 Pegtel, D. M.; Van Rheenen, J.; Schäfer, R.; Beerling, E.; Schiffelers, R. M.; De Wit,  
491 E.; Berenguer, J.; Ellenbroek, S. I. J.; Wurdinger, T.; Pegtel, D. M.; Van Rheenen, J.;  
492 Schäfer, R.; Beerling, E.; Schiffelers, R. M.; De Wit, E.; Berenguer, J.; Ellenbroek, S. I.

493 J.; Wurdinger, T.; Pegtel, D. M.; Van Rheenen, J.; Schäfer, R.; Beerling, E.;

494 Schiffelers, R. M.; De Wit, E.; Berenguer, J.; Ellenbroek, S. I. J.; Wurdinger, T.; Pegtel,

495 D. M.; Van Rheenen, J.; Schäfer, R.; Beerling, E.; Schiffelers, R. M.; De Wit, E.;

496 Berenguer, J.; Ellenbroek, S. I. J.; Wurdinger, T.; Pegtel, D. M.; Van Rheenen, J. In

497 Vivo Imaging Reveals Extracellular Vesicle-Mediated Phenocopying of Metastatic

498 Behavior. *Cell* **2015**, *161* (5), 1046–1057. <https://doi.org/10.1016/j.cell.2015.04.042>.

499 (12) Sterzenbach, U.; Putz, U.; Low, L.-H.; Silke, J.; Tan, S.-S.; Howitt, J.

500 Engineered Exosomes as Vehicles for Biologically Active Proteins. *Mol. Ther.* **2017**, *25*

501 (6), 1–10. <https://doi.org/10.1016/j.ymthe.2017.03.030>.

502 (13) Whittaker, T. E.; Nagelkerke, A.; Nele, V.; Kauscher, U.; Stevens, M. M.

503 Experimental Artefacts Can Lead to Misattribution of Bioactivity from Soluble

504 Mesenchymal Stem Cell Paracrine Factors to Extracellular Vesicles. *J. Extracell.*

505 *Vesicles* **2020**, *9* (1), 1807674. <https://doi.org/10.1080/20013078.2020.1807674>.

506 (14) Jin, Y.; Chen, Z.; Liu, X.; Zhou, X. Evaluating the MicroRNA Targeting Sites

507 by Luciferase Reporter Gene Assay. In *MicroRNA Protocols*; Ying, S.-Y., Ed.; Methods

508 in Molecular Biology; Humana Press: Totowa, NJ, 2013; Vol. 936, pp 117–127.

509 [https://doi.org/10.1007/978-1-62703-083-0\\_10](https://doi.org/10.1007/978-1-62703-083-0_10).

- 510 (15) Dixon, A. S.; Schwinn, M. K.; Hall, M. P.; Zimmerman, K.; Otto, P.; Lubben,  
511 T. H.; Butler, B. L.; Binkowski, B. F.; Machleidt, T.; Kirkland, T. A.; Wood, M. G.;  
512 Eggers, C. T.; Encell, L. P.; Wood, K. V. NanoLuc Complementation Reporter  
513 Optimized for Accurate Measurement of Protein Interactions in Cells. *ACS Chem. Biol.*  
514 **2016**, *11* (2), 400–408. <https://doi.org/10.1021/acscchembio.5b00753>.
- 515 (16) Hall, M. P.; Unch, J.; Binkowski, B. F.; Valley, M. P.; Butler, B. L.; Wood, M.  
516 G.; Otto, P.; Zimmerman, K.; Vidugiris, G.; MacHleidt, T.; Robers, M. B.; Benink, H.  
517 A.; Eggers, C. T.; Slater, M. R.; Meisenheimer, P. L.; Klaubert, D. H.; Fan, F.; Encell, L.  
518 P.; Wood, K. V. Engineered Luciferase Reporter from a Deep Sea Shrimp Utilizing a  
519 Novel Imidazopyrazinone Substrate. *ACS Chem. Biol.* **2012**.  
520 <https://doi.org/10.1021/cb3002478>.
- 521 (17) Votteler, J.; Ogohara, C.; Yi, S.; Hsia, Y.; Nattermann, U.; Belnap, D. M.;  
522 King, N. P.; Sundquist, W. I. Designed Proteins Induce the Formation of  
523 Nanocage-Containing Extracellular Vesicles. *Nature* **2016**, *540* (7632), 292–295.  
524 <https://doi.org/10.1038/nature20607>.
- 525 (18) Rider, M. A.; Hurwitz, S. N.; Meckes, D. G. ExtraPEG: A Polyethylene  
526 Glycol-Based Method for Enrichment of Extracellular Vesicles. *Sci. Rep.* **2016**, *6* (1).  
527 <https://doi.org/10.1038/srep23978>.

- 528 (19) Meyer, C.; Losacco, J.; Stickney, Z.; Li, L.; Marriott, G.; Lu, B. Pseudotyping  
529 Exosomes for Enhanced Protein Delivery in Mammalian Cells. *Int. J. Nanomedicine*  
530 **2017**, *12*, 3153–3170. <https://doi.org/10.2147/IJN.S133430>.
- 531 (20) Johannsdottir, H. K.; Mancini, R.; Kartenbeck, J.; Amato, L.; Helenius, A.  
532 Host Cell Factors and Functions Involved in Vesicular Stomatitis Virus Entry. *J. Virol.*  
533 **2009**, *83* (1), 440–453. <https://doi.org/10.1128/JVI.01864-08>.
- 534 (21) Le Blanc, I.; Luyet, P.-P.; Pons, V.; Ferguson, C.; Emans, N.; Petiot, A.;  
535 Mayran, N.; Demareux, N.; Fauré, J.; Sadoul, R.; Parton, R. G.; Gruenberg, J.  
536 Endosome-to-Cytosol Transport of Viral Nucleocapsids. *Nat. Cell Biol.* **2005**, *7* (7),  
537 653–664. <https://doi.org/10.1038/ncb1269>.
- 538 (22) Yamamoto, M.; Du, Q.; Song, J.; Wang, H.; Watanabe, A.; Tanaka, Y.;  
539 Kawaguchi, Y.; Inoue, J.; Matsuda, Z. Cell–Cell and Virus–Cell Fusion Assay–Based  
540 Analyses of Alanine Insertion Mutants in the Distal A9 Portion of the JRFL Gp41  
541 Subunit from HIV-1. *J. Biol. Chem.* **2019**, *294* (14), 5677–5687.  
542 <https://doi.org/10.1074/jbc.RA118.004579>.
- 543 (23) Fredericksen, B. L.; Whitt, M. A. Vesicular Stomatitis Virus Glycoprotein  
544 Mutations That Affect Membrane Fusion Activity and Abolish Virus Infectivity. *J.*  
545 *Virol.* **1995**, *69* (3), 1435–1443. <https://doi.org/10.1128/JVI.69.3.1435-1443.1995>.

- 546 (24) Albanese, M.; Chen, Y.-F. A.; Huels, C.; Gaertner, K.; Tagawa, T.; Keppler, O.  
547 T.; Goebel, C.; Zeidler, R.; Hammerschmidt, W. *Micro RNAs Are Minor Constituents of*  
548 *Extracellular Vesicles and Are Hardly Delivered to Target Cells*; bioRxiv; preprint;  
549 Cell Biology, 2020. <https://doi.org/10.1101/2020.05.20.106393>.
- 550 (25) Le Saux, S.; Aarrass, H.; Lai-Kee-Him, J.; Bron, P.; Armengaud, J.; Miotello,  
551 G.; Bertrand-Michel, J.; Dubois, E.; George, S.; Faklaris, O.; Devoisselle, J.-M.;  
552 Legrand, P.; Chopineau, J.; Morille, M. Post-Production Modifications of Murine  
553 Mesenchymal Stem Cell (MMSC) Derived Extracellular Vesicles (EVs) and Impact on  
554 Their Cellular Interaction. *Biomaterials* **2020**, *231*, 119675.  
555 <https://doi.org/10.1016/j.biomaterials.2019.119675>.
- 556 (26) Pastuzyn, E. D.; Day, C. E.; Kearns, R. B.; Kyrke-Smith, M.; Taibi, A. V.;  
557 McCormick, J.; Yoder, N.; Belnap, D. M.; Erlendsson, S.; Morado, D. R.; Briggs, J. A.  
558 G.; Feschotte, C.; Shepherd, J. D. The Neuronal Gene Arc Encodes a Repurposed  
559 Retrotransposon Gag Protein That Mediates Intercellular RNA Transfer. *Cell* **2018**, *172*  
560 (1–2), 275–288.e18. <https://doi.org/10.1016/j.cell.2017.12.024>.
- 561 (27) Yao, Z.; Qiao, Y.; Li, X.; Chen, J.; Ding, J.; Bai, L.; Shen, F.; Shi, B.; Liu, J.;  
562 Peng, L.; Li, J.; Yuan, Z. Exosomes Exploit the Virus Entry Machinery and Pathway To

- 563 Transmit Alpha Interferon-Induced Antiviral Activity. *J. Virol.* **2018**, *92* (24),  
564 e01578-18, /jvi/92/24/e01578-18.atom. <https://doi.org/10.1128/JVI.01578-18>.  
565 (28) Horibe, S.; Tanahashi, T.; Kawauchi, S.; Murakami, Y.; Rikitake, Y.  
566 Mechanism of Recipient Cell-Dependent Differences in Exosome Uptake. *BMC Cancer*  
567 **2018**, *18* (1), 47. <https://doi.org/10.1186/s12885-017-3958-1>.  
568 (29) Colpitts, T. M.; Moore, A. C.; Kolokoltsov, A. A.; Davey, R. A. Venezuelan  
569 Equine Encephalitis Virus Infection of Mosquito Cells Requires Acidification as Well  
570 as Mosquito Homologs of the Endocytic Proteins Rab5 and Rab7. *Virology* **2007**, *369*  
571 (1), 78–91. <https://doi.org/10.1016/j.virol.2007.07.012>.  
572 (30) Yonezawa, A.; Cavrois, M.; Greene, W. C. Studies of Ebola Virus  
573 Glycoprotein-Mediated Entry and Fusion by Using Pseudotyped Human  
574 Immunodeficiency Virus Type 1 Virions: Involvement of Cytoskeletal Proteins and  
575 Enhancement by Tumor Necrosis Factor Alpha. *J. Virol.* **2005**, *79* (2), 918–926.  
576 <https://doi.org/10.1128/JVI.79.2.918-926.2005>.  
577 (31) Heath, N.; Osteikoetxea, X.; de Oliveria, T. M.; Lázaro-Ibáñez, E.; Shatnyeva,  
578 O.; Schindler, C.; Tigue, N.; Mayr, L. M.; Dekker, N.; Overman, R.; Davies, R.  
579 Endosomal Escape Enhancing Compounds Facilitate Functional Delivery of



- 580 Extracellular Vesicle Cargo. *Nanomed.* **2019**, *14* (21), 2799–2814.
- 581 <https://doi.org/10.2217/nnm-2019-0061>.
- 582 (32) Sasaki, M.; Anindita, P. D.; Phongphaew, W.; Carr, M.; Kobayashi, S.; Orba,  
583 Y.; Sawa, H. Development of a Rapid and Quantitative Method for the Analysis of  
584 Viral Entry and Release Using a NanoLuc Luciferase Complementation Assay. *Virus*  
585 *Res.* **2018**, *243*, 69–74. <https://doi.org/10.1016/j.virusres.2017.10.015>.
- 586 (33) Miyakawa, K.; Jeremiah, S. S.; Ohtake, N.; Matsunaga, S.; Yamaoka, Y.; Nishi,  
587 M.; Morita, T.; Saji, R.; Nishii, M.; Kimura, H.; Hasegawa, H.; Takeuchi, I.; Ryo, A.  
588 *Rapid Quantitative Screening Assay for SARS-CoV-2 Neutralizing Antibodies Using*  
589 *HiBiT-Tagged Virus-like Particles*; preprint; Infectious Diseases (except HIV/AIDS),  
590 2020. <https://doi.org/10.1101/2020.07.20.20158410>.
- 591 (34) Evans, B. C.; Fletcher, R. B.; Kilchrist, K. V.; Dailing, E. A.; Mukalel, A. J.;  
592 Colazo, J. M.; Oliver, M.; Cheung-Flynn, J.; Brophy, C. M.; Tierney, J. W.; Isenberg, J.  
593 S.; Hankenson, K. D.; Ghimire, K.; Lander, C.; Gersbach, C. A.; Duvall, C. L. An  
594 Anionic, Endosome-Escaping Polymer to Potentiate Intracellular Delivery of Cationic  
595 Peptides, Biomacromolecules, and Nanoparticles. *Nat. Commun.* **2019**, *10* (1), 5012.  
596 <https://doi.org/10.1038/s41467-019-12906-y>.

- 597 (35) Toribio, V.; Morales, S.; López-Martín, S.; Cardeños, B.; Cabañas, C.;
- 598 Yáñez-Mó, M. Development of a Quantitative Method to Measure EV Uptake. *Sci. Rep.*
- 599 **2019**, *9* (1), 10522. <https://doi.org/10.1038/s41598-019-47023-9>.
- 600 (36) Hsia, Y.; Bale, J. B.; Gonen, S.; Shi, D.; Sheffler, W.; Fong, K. K.; Nattermann,
- 601 U.; Xu, C.; Huang, P.-S.; Ravichandran, R.; Yi, S.; Davis, T. N.; Gonen, T.; King, N.
- 602 P.; Baker, D. Design of a Hyperstable 60-Subunit Protein Icosahedron. *Nature* **2016**,
- 603 *535* (7610), 136–139. <https://doi.org/10.1038/nature18010>.
- 604 (37) Gibson, D. G.; Young, L.; Chuang, R.-Y.; Venter, J. C.; Hutchison, C. A.;
- 605 Smith, H. O. Enzymatic Assembly of DNA Molecules up to Several Hundred Kilobases.
- 606 *Nat. Methods* **2009**, *6* (5), 343–345. <https://doi.org/10.1038/nmeth.1318>.
- 607
